# Supplementary material for: Bladder inflammatory transcriptome in response to tachykinins: Neurokinin 1 receptor-dependent genes and transcription regulatory elements
Source: PubMed Central journal article supplement (PMC1888709; doi:10.1186/1471-2490-7-7), 2007-05-22
Supplement: 1471-2490-7-7-S1.pdf [file 1471-2490-7-7-S1.pdf]

**TABLE 1. NK1R-Dependent Genes and Respective Transcription Regulators**

| Abbrev   | GenBank ID | Gene Name                                                         | GO Biological Process                 | Family                            | LOCATION            | TER (probability) |                |                |              |
|----------|------------|-------------------------------------------------------------------|---------------------------------------|-----------------------------------|---------------------|-------------------|----------------|----------------|--------------|
| AGC1     | L07049     | aggrecan 1                                                        | Cell Adhesion/hyaluronic acid binding | Other                             | Extracellular Space | c-Rel (0.0004)    | USF (0.06)     |                |              |
| APOE     | M12414     | apolipoprotein E                                                  | Extracellular Transporters & Carriers | Transporter                       | Extracellular Space | USF (0.06)        |                |                |              |
| BID      | U75506     | BH3 interacting domain death agonist                              | Apoptosis                             | Other                             | Cytoplasm           | USF (0.06)        |                |                |              |
| BRCA1    | U31625     | breast/ovarian cancer susceptibility locus 1                      | Oncogenes & Tumor Suppressors         | Transcription regulator           | Nucleus             | v-Myb (0.05)      |                |                |              |
| BST1     | D31788     | bone marrow stromal cell antigen 1                                | Immune response                       | Enzyme                            | Plasma Membrane     | c-Rel (0.0004)    | AP-1_C (0.05)  |                |              |
| CCND2    | M83749     | cyclin D2                                                         | Cell cycle                            | Other                             | Nucleus             | c-Rel (0.0004)    |                |                |              |
| CCNG1    | Z37110     | cyclin G1                                                         | Cell cycle                            | Other                             | Nucleus             | c-Rel (0.0004)    | v-Myb (0.05)   |                |              |
| CD44     | M27129     | CD44 antigen                                                      | Cell Adhesion/hyaluronic acid binding | Other                             | Plasma Membrane     | c-Rel (0.0004)    |                |                |              |
| CDC42    | U37720     | cell division cycle 42                                            | cytokinesis                           | Enzyme                            | Cytoplasm           | CREB_01 (0.06)    | CRE-BP1 (0.07) |                |              |
| CTSW     | AF014941   | cathepsin W                                                       | Immune response                       | Peptidase                         | Cytoplasm           | v-Myb (0.05)      | AP-1_Q2 (0.05) |                |              |
| DAB2     | U18869     | disabled homolog 2                                                | Receptor mediated endocytosis         | Other                             | Plasma Membrane     | Pax-6 (0.05)      |                |                |              |
| EPHA2    | X78339     | ephrin type A receptor 2                                          | Receptor tyrosine kinase              | Kinase                            | Plasma Membrane     | CREB_01 (0.06)    | CRE-BP1 (0.07) |                |              |
| FAF1     | U39643     | Fas (TNFRSF6) associated factor 1                                 | Apoptosis                             | Other                             | Nucleus             | USF (0.06)        |                |                |              |
| FGF11    | U66203     | fibroblast growth factor 11                                       | Cell-cell signaling                   | Signal Transduction               |                     | Pax-6 (0.05)      |                |                |              |
| FLI1     | X59421     | ets-related proto-oncogene                                        | Oncogenes & Tumor Suppressors         | Transcription regulator           | Nucleus             | AP-1_C (0.05)     |                |                |              |
| VEGFR1   | L07297     | vascular endothelial growth factor receptor 1                     | Oncogenes & Tumor Suppressors         | Kinase                            | Plasma Membrane     | CREB_01 (0.06)    | CRE-BP1 (0.07) | Egr-3 (0.006)  | Egr-1 (0.01) |
| FMR2     | AJ001549   | fragile X mental retardation syndrome 2                           | Development                           |                                   |                     | AP-1_Q2 (0.05)    |                |                |              |
| FOXA1    | X74936     | hepatocyte nuclear factor 3 alpha                                 | Transcription Activators & Repressors | Transcription regulator           | Nucleus             | AP-1_Q2 (0.05)    |                |                |              |
| GJA7     | X63100     | gap junction alpha 7 protein                                      | Cell-cell signaling                   | Transporter                       | Plasma Membrane     | v-Myb (0.05)      |                |                |              |
| GNA13    | M63660     | guanine nucleotide binding protein                                | GPCR                                  | Enzyme                            | Plasma Membrane     | USF (0.06)        |                |                |              |
| GRID1    | D10171     | glutamate receptor, ionotropic, delta 1                           | Synaptic transmission                 |                                   |                     | USF (0.06)        |                |                |              |
| GZMA     | M13226     | granzyme A (EC 3.4.21.78)                                         | Apoptosis                             | Peptidase                         | Cytoplasm           | USF (0.06)        |                |                |              |
| HSF1     | X61753     | heat shock transcription factor 1                                 | Transcription Activators & Repressors | Transcription regulator           | Nucleus             | v-Myb (0.05)      |                |                |              |
| HSPD1    | X53584     | heat shock 60kDa protein 1                                        | Heat Shock Proteins                   | Other                             | Cytoplasm           | v-Myb (0.05)      | AP-1_C (0.05)  |                |              |
| HSPH1    | L40406     | heat shock protein 105                                            | Heat Shock Proteins                   | Other                             | Cytoplasm           | v-Myb (0.05)      |                |                |              |
| IER2     | M31042     | T-lymphocyte activated protein                                    | Transcription Activators & Repressors | Other                             | Cytoplasm           | CREB_01 (0.06)    | CRE-BP1 (0.07) | c-Rel (0.0004) |              |
| IFNGR1   | M28233     | interferon-gamma receptor                                         | Interferons                           | Transmembrane Receptors           | Plasma Membrane     | CREB_01 (0.06)    | CRE-BP1 (0.07) |                |              |
| IL1R1    | M20658     | interleukin-1 receptor                                            | Immune response                       | Transmembrane Receptors           | Plasma Membrane     | v-Myb (0.05)      | USF (0.06)     |                |              |
| KCNAB1   | AF033003   | K+ channel beta-1 subunit shaker-related                          | Membrane Channels                     | Ion Channel                       | Plasma Membrane     | Pax-6 (0.05)      |                |                |              |
| KCNQ1    | U70068     | K+ KQT-like 1                                                     | Membrane Channels                     | Ion Channel                       | Plasma Membrane     | c-Rel (0.0004)    |                |                |              |
| KIF1B    | D17577     | kinesin heavy chain member 1B                                     | cytokinesis                           | Transporter                       | Cytoplasm           | Pax-6 (0.05)      | v-Myb (0.05)   |                |              |
| KNCJ12   | X80417     | K+ channel, subfamily J, member 12                                | Membrane Channels                     | Ion Channel                       | Plasma Membrane     | c-Rel (0.0004)    | AREB6 (0.05)   |                |              |
| MAP3K7   | D76446     | mitogen-activated protein kinase kinase 7/TGFB-activated kinase 1 | Intracellular Transducers             | Enzyme                            | Cytoplasm           | v-Myb (0.05)      |                |                |              |
| MAP3K8   | D13759     | Cot proto-oncogene                                                | Oncogenes & Tumor Suppressors         | Kinase                            | Cytoplasm           | c-Rel (0.0004)    |                |                |              |
| MET      | Y00671     | c-Met proto-oncogene                                              | Oncogenes & Tumor Suppressors         | Kinase                            | Plasma Membrane     | Pax-6 (0.05)      | AP-1_C (0.05)  |                |              |
| MXD1     | X83106     | MAX dimerization protein                                          | Growth Factors                        | Transcription regulator           | Nucleus             | CREB_01 (0.06)    | CRE-BP1 (0.07) |                |              |
| NEUROD6  | U29086     | neurogenic differentiation 6 (neuronal helix-loop-helix )         | Regulation of transcription           | Transcription regulator           | Nucleus             | CREB_01 (0.06)    | CRE-BP1 (0.07) |                |              |
| NF2      | L27105     | neurofibromatosis type 2 susceptibility                           | Oncogenes & Tumor Suppressors         | Other                             | Plasma Membrane     | CRE-BP1 (0.07)    |                |                |              |
| NOS2A    | M87039     | nitric oxide synthase 2A                                          | Apoptosis                             | Enzyme                            | Cytoplasm           | c-Rel (0.0004)    | AP-1_Q2 (0.05) |                |              |
| NR1H2    | U09419     | nuclear receptor subfamily 1/ LRX                                 | Transcription Activators & Repressors | Ligand-dependent nuclear receptor | Nucleus             | c-Rel (0.0004)    |                |                |              |
| PCSK1    | M58589     | proprotein convertase subtilisin/kexin                            | Nucleotide Metabolism                 | Peptidase                         | Extracellular Space | CREB_01 (0.06)    | CRE-BP1 (0.07) |                |              |
| PRNP     | M13685     | major prion protein precursor                                     | Heat Shock Proteins                   | Other                             | Plasma Membrane     | v-Myb (0.05)      | AP-1_Q2 (0.05) |                |              |
| PTGIR    | D26157     | prostaglandin I2 receptor                                         | GPCR                                  | GPCR                              | Plasma Membrane     | c-Rel (0.0004)    | NF-kB (0.05)   |                |              |
| RET      | X67812     | c-ret proto-oncogene                                              | Oncogenes & Tumor Suppressors         | Kinase                            | Plasma Membrane     | c-Rel (0.0004)    | v-Myb (0.05)   |                |              |
| SKIL     | U36203     | ski-like oncogene                                                 | Oncogenes & Tumor Suppressors         | Transcription regulator           | Nucleus             | c-Rel (0.0004)    |                |                |              |
| SLC16A1  | AF058055   | Monocarboxylate transporter                                       | Symporters & Antiporters              | Transporter                       | Plasma Membrane     | USF (0.06)        |                |                |              |
| SLC1A1   | U73521     | high affinity glutamate transporter                               | Symporters & Antiporters              | Kinase                            | Nucleus             | c-Rel (0.0004)    |                |                |              |
| SLC30A4  | AF003747   | Soluble carrier family 30 (zinc family) member 4                  | Membrane Channels                     |                                   |                     | NF-kB (0.05)      |                |                |              |
| SLC6A1   | M92378     | soluble carrier 6/GABA transporter 1                              | Symporters & Antiporters              | Transporter                       | Plasma Membrane     | c-Rel (0.0004)    |                |                |              |
| SRPK2    | U92456     | SFRS protein kinase 2/WBP6                                        | Intracellular Kinases                 | Kinase                            | Nucleus             | v-Myb (0.05)      |                |                |              |
| TNFRSF1A | X57796     | tumor necrosis factor receptor 1                                  | Apoptosis                             |                                   |                     | c-Rel (0.0004)    |                |                |              |
| TNFRSF1B | M59378     | tumor necrosis factor receptor 2                                  | Apoptosis                             |                                   |                     | c-Rel (0.0004)    |                |                |              |
| TRAF3    | U21050     | TNF receptor-associated factor 3                                  | Apoptosis                             | Other                             | Cytoplasm           | c-Rel (0.0004)    | USF (0.06)     | NF-kB (0.05)   |              |
| VIL2     | X60671     | ezrin, villin 2                                                   | Oncogenes & Tumor Suppressors         | Other                             | Plasma Membrane     | Pax-6 (0.05)      |                |                |              |
| YTPH1    | J04758     | tryptophan hydroxylase                                            | Serotonin biosynthesis                | Enzyme                            | Unkown              | NF-kB (0.05)      | AP-1_Q2 (0.05) |                |              |
| YWHAH    | U57311     | tyrosine 3-mooxygenase/ eta polypeptide                           | Kinase Activators & Inhibitors        | Other                             | Cytoplasm           | CREB_01 (0.06)    | CRE-BP1 (0.07) |                |              |
