# Supplementary material for: Bladder inflammatory transcriptome in response to tachykinins: Neurokinin 1 receptor-dependent genes and transcription regulatory elements
Source: PubMed Central journal article supplement (PMC1888709; doi:10.1186/1471-2490-7-7), 2007-05-22
Supplement: 1471-2490-7-7-S2.pdf [file 1471-2490-7-7-S2.pdf]

**Table 2. NK1R-dependent genes involved in Canonic Pathways.**

| Abbrev   | Gene Name                                                         | Pathways |          |      |      |                |           |          |
|----------|-------------------------------------------------------------------|----------|----------|------|------|----------------|-----------|----------|
|          |                                                                   | NFKB     | p38 MAPK | PPAR | IL-6 | Death Receptor | Apoptosis | SAPK/JNK |
| BID      | BH3 interacting domain death agonist                              |          |          |      |      | Yes            | Yes       |          |
| CDC42    | cell division cycle 42                                            |          |          |      |      |                |           | Yes      |
| GNA13    | guanine nucleotide binding protein                                |          |          |      |      |                |           | Yes      |
| IL1R1    | interleukin-1 receptor                                            | Yes      | Yes      | Yes  | Yes  |                |           |          |
| MAP3K7   | mitogen-activated protein kinase kinase 7/TGFb-activated kinase 1 | Yes      | Yes      | Yes  | Yes  |                |           | Yes      |
| MAP3K8   | Cot proto-oncogene                                                | Yes      |          |      |      |                |           |          |
| TNFRSF1A | TNF receptor 1                                                    | Yes      | Yes      | Yes  | Yes  | Yes            | Yes       |          |
| TNFRSF1B | TNF receptor 2                                                    |          | Yes      | Yes  | Yes  | Yes            | Yes       |          |
| TRAF3    | TNF receptor-associated factor 3                                  | Yes      |          |      |      |                |           |          |
