# Supplementary material for: Bladder inflammatory transcriptome in response to tachykinins: Neurokinin 1 receptor-dependent genes and transcription regulatory elements
Source: PubMed Central journal article supplement (PMC1888709; doi:10.1186/1471-2490-7-7), 2007-05-22
Supplement: 1471-2490-7-7-S3.pdf [file 1471-2490-7-7-S3.pdf]

**Table 3. Genes regulated by Nkx2-5/V\$NKX25\_01 and Nkx2-5/V\$NKX25\_02**

| <b>Nkx2-5/V\$NKX25_01</b> |                   |                                           |
|---------------------------|-------------------|-------------------------------------------|
| <b>Abbrev</b>             | <b>GenBank ID</b> | <b>Gene Name</b>                          |
| <b>A10</b>                | <b>L21027</b>     | transcription factor A10                  |
| alpha-NGF                 | M11434            | 7S nerve growth factor alpha              |
| APC                       | M88127            | adenomatous polyposis coli protein        |
| BID                       | U75506            | BH3 interacting domain death agonist      |
| Bub1                      | AF002823          | Bub1 mitotic checkpoint kinase            |
| CD 40L                    | M83312            | CD 40L receptor                           |
| CRABP2                    | M35523            | cellular retinoic acid-binding protein II |
| CREB1                     | M95106            | cAMP responsive element binding protein 1 |
| CUTL1                     | U46684            | CUT-related homeobox CUX-1                |
| DCM1                      | D64107            | meiotic recombination protein             |
| EAAC1                     | U73521            | Excitatory amino acid transporter 3       |
| <b>EGF</b>                | <b>J00380</b>     | epidermal growth factor                   |
| EPITHIN                   | AF042822          | Epithin                                   |
| EYA3                      | U61112            | eyes absent homolog 3                     |
| FGF3                      | M81342            | fibroblast growth factor 3 precursor      |
| Gsta2                     | J03958            | glutathione S-transferase A               |
| HMR                       | J04113            | nuclear hormone receptor                  |
| HSP65                     | X53584            | heat shock 60-kDa protein                 |
| IL-1 R                    | M20658            | interleukin-1 receptor                    |
| IL-6                      | X06203            | Interleukin-6 precursor                   |
| MEF2A                     | U30823            | myocyte-specific enhancer factor 2A       |
| MFNG                      | U94349            | manic fringe homolog precursor            |
| Mgcm1                     | U59876            | glial cells missing gene homolog          |
| NEUROD1                   | U28068            | neurogenic differentiation factor 1       |
| NF1                       | X54924            | neurofibromatosis 1                       |
| PAR3                      | U92972            | proteinase-activated receptor 3           |
| PKCB                      | X53532            | protein kinase C beta II                  |
| POU                       | U43788            | POU domain (class 2) associated factor 1  |
| RARA                      | M60909            | retinoic acid receptor alpha              |
| SEMA3C                    | X85994            | semaphorin IIIC                           |
| SEMAF                     | X97817            | semaphorin F                              |
| SMBP2                     | L10075            | DNA-binding protein                       |
| snoN                      | U36203            | ski-related oncogene                      |
| THAM                      | X58384            | thymocyte-activating molecule             |
| TRAF3                     | U21050            | TNF receptor-associated factor 3          |
| TSP2                      | L07918            | thrombospondin 2 precursor                |
| WNT3                      | M32502            | wingless-related MMTV integration site 3  |

| <b>Nkx2-5/V\$NKX25_02</b> |                   |                                            |
|---------------------------|-------------------|--------------------------------------------|
| <b>Abbrev</b>             | <b>GenBank ID</b> | <b>Gene Name</b>                           |
| <b>A10</b>                | <b>L21027</b>     | transcription factor A10                   |
| <b>EGF</b>                | <b>J00380</b>     | epidermal growth factor                    |
| ELK-1 PO                  | X87257            | Elk-1 ets-related proto-oncogene           |
| EYA1                      | U61110            | eyes absent homolog 1                      |
| Hsf1                      | X61753            | transcription factor 1 for heat shock gene |
| Myf5                      | X56182            | myogenic factor 5                          |
| TRAIL                     | U37522            | TNF-related apoptosis inducing ligand      |
| ZO1                       | D14340            | tight junction protein                     |

Genes in bold face are regulated by both \_01 and \_02 matrixes
